# Supplementary material for: Neutral Competition for Drosophila Follicle and Cyst Stem Cell Niches Requires Vesicle Trafficking Genes
Source: PubMed Central journal article supplement (PMC5500140; doi:10.1534/genetics.117.201202), 2017-05-16
Supplement: 1417FileS2.pdf [file 1417FileS2.pdf]

Table S1

| Gene     | Mutation                 | Type     | None   | Single | Double | n=  | Total Marked FSCs | $\chi^2$ p-value |
|----------|--------------------------|----------|--------|--------|--------|-----|-------------------|------------------|
| Arp2     | W89stop                  | nonsense | 100.0% | 0.0%   | 0.0%   | 143 | 0.0%              | 5.9E-15          |
| CG11417  | R103stop                 | nonsense | 100.0% | 0.0%   | 0.0%   | 146 | 0.0%              | 3.1E-15          |
| CG8636   | K216stop                 | nonsense | 100.0% | 0.0%   | 0.0%   | 156 | 0.0%              | 3.5E-16          |
| Crag     | C1372S                   | missense | 100.0% | 0.0%   | 0.0%   | 153 | 0.0%              | 6.7E-16          |
| Cyp4d2   | K350X                    | nonsense | 100.0% | 0.0%   | 0.0%   | 128 | 0.0%              | 1.5E-13          |
| I(1)1Bi  | L285stop                 | nonsense | 100.0% | 0.0%   | 0.0%   | 62  | 0.0%              | 2.7E-07          |
| Nmd3     | V4516E                   | missense | 100.0% | 0.0%   | 0.0%   | 154 | 0.0%              | 5.4E-16          |
| Rhp      | M1K                      | missense | 100.0% | 0.0%   | 0.0%   | 93  | 0.0%              | 3.1E-10          |
| RpS5A    | Y80stop                  | nonsense | 100.0% | 0.0%   | 0.0%   | 70  | 0.0%              | 4.7E-08          |
| Tko      | Q6stop                   | nonsense | 100.0% | 0.0%   | 0.0%   | 115 | 0.0%              | 2.5E-12          |
| Upf1     | W120stop                 | nonsense | 100.0% | 0.0%   | 0.0%   | 98  | 0.0%              | 1.0E-10          |
| Wds      | G132N                    | missense | 100.0% | 0.0%   | 0.0%   | 82  | 0.0%              | 3.4E-09          |
| Zpr1     | C46S                     | missense | 100.0% | 0.0%   | 0.0%   | 26  | 0.0%              | 8.7E-04          |
| CDC45L   | Q540stop                 | nonsense | 99.2%  | 0.8%   | 0.0%   | 125 | 0.8%              | 9.8E-13          |
| CG1703   | Q641stop                 | nonsense | 99.0%  | 1.0%   | 0.0%   | 103 | 1.0%              | 1.2E-10          |
| Shi      | K28stop                  | nonsense | 98.6%  | 1.4%   | 0.0%   | 69  | 1.4%              | 2.0E-07          |
| dsh      | (none found)             | n/a      | 98.4%  | 1.6%   | 0.0%   | 123 | 1.6%              | 5.0E-12          |
| mRpL38   | Q88stop                  | nonsense | 98.1%  | 1.9%   | 0.0%   | 157 | 1.9%              | 1.0E-14          |
| wap      | Y842stop                 | nonsense | 97.9%  | 2.1%   | 0.0%   | 47  | 2.1%              | 2.6E-05          |
| CG7065   | K327stop                 | nonsense | 96.3%  | 3.7%   | 0.0%   | 164 | 3.7%              | 6.9E-14          |
| CG34401  | W946stop                 | nonsense | 96.2%  | 3.8%   | 0.0%   | 156 | 3.8%              | 3.8E-13          |
| CG11418  | Q47stop                  | nonsense | 95.3%  | 4.7%   | 0.0%   | 172 | 4.7%              | 1.1E-13          |
| Phi      | L163R                    | missense | 94.4%  | 5.6%   | 0.0%   | 36  | 5.6%              | 9.7E-04          |
| Wus      | Q307stop                 | nonsense | 93.8%  | 6.3%   | 0.0%   | 32  | 6.3%              | 2.4E-03          |
| CG3704   | E300stop                 | nonsense | 93.1%  | 6.9%   | 0.0%   | 102 | 6.9%              | 1.1E-07          |
| mus101   | Q525stop                 | nonsense | 90.8%  | 9.2%   | 0.0%   | 174 | 9.2%              | 2.0E-10          |
| TH1      | R149stop                 | nonsense | 89.2%  | 10.8%  | 0.0%   | 111 | 10.8%             | 1.9E-06          |
| CG3446   | E82V                     | missense | 87.2%  | 12.8%  | 0.0%   | 86  | 12.8%             | 1.2E-04          |
| Inx2     | Q194stop                 | nonsense | 88.0%  | 11.1%  | 0.9%   | 108 | 13.0%             | 1.9E-05          |
| flw      | K156stop                 | nonsense | 88.3%  | 10.4%  | 1.3%   | 77  | 13.0%             | 3.0E-04          |
| Vps26    | K264stop                 | nonsense | 86.5%  | 12.0%  | 1.5%   | 133 | 15.0%             | 1.7E-05          |
| Usf      | Y248N                    | missense | 84.7%  | 13.6%  | 1.7%   | 59  | 16.9%             | 9.4E-03          |
| Kdn      | W370stop<br>(PB isoform) | nonsense | 87.5%  | 6.9%   | 5.6%   | 160 | 18.1%             | 6.4E-05          |
| CG15208  | L318F                    | missense | 81.1%  | 17.9%  | 0.9%   | 106 | 19.8%             | 3.4E-03          |
| Cdk7     | E68K                     | missense | 80.0%  | 20.0%  | 0.0%   | 50  | 20.0%             | 0.05             |
| Scu      | Q159stop                 | nonsense | 79.2%  | 20.8%  | 0.0%   | 101 | 20.8%             | 7.4E-03          |
| dor      | Q208stop                 | nonsense | 79.4%  | 19.6%  | 0.9%   | 107 | 21.5%             | 8.7E-03          |
| Aats-his | D160V                    | missense | 80.0%  | 17.2%  | 2.8%   | 180 | 22.8%             | 2.1E-03          |
| Egh      | D241N                    | missense | 74.5%  | 23.6%  | 1.8%   | 110 | 27.3%             | 0.13             |
| COQ7     | Y90stop                  | nonsense | 75.0%  | 22.5%  | 2.5%   | 40  | 27.5%             | 0.37             |

|                                |                    |          |       |       |       |     |       |         |
|--------------------------------|--------------------|----------|-------|-------|-------|-----|-------|---------|
| <b>Prosa4</b>                  | G36R               | missense | 75.0% | 22.1% | 2.9%  | 140 | 27.9% | 0.11    |
| <b>CG8184</b>                  | T1107I             | missense | 76.4% | 18.5% | 5.1%  | 178 | 28.7% | 0.11    |
| <b>CG1749</b>                  | K298stop           | nonsense | 74.5% | 21.4% | 4.1%  | 145 | 29.7% | 0.22    |
| <b>Stim</b>                    | W202stop           | nonsense | 73.3% | 22.6% | 4.1%  | 195 | 30.8% | 0.26    |
| <b>I(1)G0255</b>               | V141M              | missense | 72.8% | 23.5% | 3.7%  | 136 | 30.9% | 0.36    |
| <b>CG3011</b>                  | M281R              | missense | 70.9% | 26.3% | 2.9%  | 175 | 32.0% | 0.44    |
| <b>DAAM</b>                    | N360V              | missense | 71.4% | 24.8% | 3.8%  | 105 | 32.4% | 0.60    |
| <b>br</b>                      | C665R              | missense | 74.1% | 18.2% | 7.7%  | 143 | 33.6% | 0.73    |
| <b>CG17776</b>                 | Y21stop            | nonsense | 71.3% | 23.6% | 5.1%  | 178 | 33.7% | 0.72    |
| <b>CG42237</b>                 | E361K              | missense | 70.7% | 24.4% | 4.9%  | 164 | 34.1% | 0.81    |
| <b>mew</b>                     | R165stop           | nonsense | 68.8% | 28.1% | 3.1%  | 160 | 34.4% | 0.86    |
| <b>Sp1</b>                     | Q8stop             | nonsense | 69.5% | 26.3% | 4.2%  | 118 | 34.7% | 0.94    |
| <b>Rap</b>                     | (not assessed)     | n/a      | 69.6% | 26.1% | 4.3%  | 138 | 34.8% | 0.94    |
| <b>AP-1<math>\gamma</math></b> | L133P              | missense | 68.8% | 27.5% | 3.7%  | 109 | 34.9% | 0.96    |
| <b>iso19A</b>                  | n/a                | n/a      | 71.6% | 21.6% | 6.8%  | 148 | 35.1% | NA      |
| <b>I(1)G0334</b>               | G126E (PA isoform) | missense | 70.5% | 23.8% | 5.7%  | 105 | 35.2% | 0.98    |
| <b>mst</b>                     | V216E              | missense | 68.0% | 28.7% | 3.3%  | 122 | 35.2% | 0.98    |
| <b>smox</b>                    | Q313stop           | nonsense | 70.1% | 24.5% | 5.4%  | 147 | 35.4% | 0.96    |
| <b>ewg</b>                     | Q80stop            | nonsense | 69.7% | 23.6% | 6.7%  | 89  | 37.1% | 0.73    |
| <b>Schlank</b>                 | S344P              | missense | 65.9% | 29.5% | 4.5%  | 132 | 38.6% | 0.45    |
| <b>Gtp-bp</b>                  | V439D              | missense | 66.7% | 27.9% | 5.4%  | 111 | 38.7% | 0.48    |
| <b>Tay</b>                     | R990stop           | nonsense | 68.0% | 25.2% | 6.8%  | 147 | 38.8% | 0.41    |
| <b>Pck</b>                     | P50L               | missense | 67.5% | 23.4% | 9.1%  | 77  | 41.6% | 0.29    |
| <b>CG13365</b>                 | V47D               | missense | 65.9% | 26.2% | 7.9%  | 214 | 42.1% | 0.06    |
| <b>dlg1</b>                    | splice donor       | splice   | 67.5% | 21.4% | 11.1% | 126 | 43.7% | 0.08    |
| <b>Sicily</b>                  | Q133stop           | nonsense | 63.4% | 28.5% | 8.1%  | 186 | 44.6% | 0.02    |
| <b>CG42749</b>                 | Q27X               | missense | 59.0% | 30.8% | 10.3% | 117 | 51.3% | 1.2E-03 |

Genes involved in vesicle trafficking are shaded in orange, the isogenized control is shaded in yellow, candidate hypercompetition alleles are shaded in green, and candidate hypocompetition alleles are shaded in blue.

**Table S2**

| Gene              | Mutation        | Type     | None   | Single | Double | n=  | Total Marked FSCs | $\chi^2$ p-value |
|-------------------|-----------------|----------|--------|--------|--------|-----|-------------------|------------------|
| RpS5A             | Y80stop         | nonsense | 100.0% | 0.0%   | 0.0%   | 102 | 0.0%              | 7.1E-07          |
| CG2918            | Q619stop        | nonsense | 100.0% | 0.0%   | 0.0%   | 84  | 0.0%              | 6.8E-06          |
| CG4165            | splice donor    | splice   | 100.0% | 0.0%   | 0.0%   | 55  | 0.0%              | 2.7E-04          |
| Ck1 $\alpha$      | L141M           | missense | 100.0% | 0.0%   | 0.0%   | 80  | 0.0%              | 1.1E-05          |
| eIF2B- $\epsilon$ | Y534stop        | nonsense | 100.0% | 0.0%   | 0.0%   | 106 | 0.0%              | 4.3E-07          |
| Mcm6              | Q510stop        | nonsense | 100.0% | 0.0%   | 0.0%   | 56  | 0.0%              | 2.4E-04          |
| mRNA-cap          | Y346stop        | nonsense | 100.0% | 0.0%   | 0.0%   | 105 | 0.0%              | 4.9E-07          |
| mxc               | Q615stop        | nonsense | 100.0% | 0.0%   | 0.0%   | 58  | 0.0%              | 1.8E-04          |
| PpV               | I117F           | missense | 100.0% | 0.0%   | 0.0%   | 76  | 0.0%              | 1.9E-05          |
| Psf3              | Q141stop        | nonsense | 100.0% | 0.0%   | 0.0%   | 78  | 0.0%              | 1.4E-05          |
| Rbcn-3A           | Q41stop         | nonsense | 100.0% | 0.0%   | 0.0%   | 36  | 0.0%              | 3.2E-03          |
| Rbcn-3B           | R1294stop       | nonsense | 100.0% | 0.0%   | 0.0%   | 79  | 0.0%              | 1.3E-05          |
| RplI215           | V785E           | missense | 100.0% | 0.0%   | 0.0%   | 90  | 0.0%              | 3.2E-06          |
| Sas10             | Q177stop        | nonsense | 100.0% | 0.0%   | 0.0%   | 94  | 0.0%              | 1.9E-06          |
| SkpA              | L22stop         | nonsense | 100.0% | 0.0%   | 0.0%   | 94  | 0.0%              | 1.9E-06          |
| vnd               | splice acceptor | splice   | 100.0% | 0.0%   | 0.0%   | 73  | 0.0%              | 2.7E-05          |
| Ykt6              | Q62R            | missense | 100.0% | 0.0%   | 0.0%   | 96  | 0.0%              | 1.5E-06          |
| sgg               | P223L           | missense | 99.1%  | 0.9%   | 0.0%   | 114 | 0.9%              | 4.9E-07          |
| CG3149            | W535stop        | nonsense | 99.0%  | 1.0%   | 0.0%   | 96  | 1.0%              | 4.7E-06          |
| CG1597            | Y761N           | missense | 97.7%  | 2.3%   | 0.0%   | 44  | 2.3%              | 3.6E-03          |
| temp              | K14stop         | nonsense | 97.5%  | 2.5%   | 0.0%   | 80  | 2.5%              | 1.0E-04          |
| por               | R135stop        | nonsense | 97.4%  | 2.6%   | 0.0%   | 76  | 2.6%              | 1.7E-04          |
| nej               | Y1001N          | missense | 96.0%  | 4.0%   | 0.0%   | 25  | 4.0%              | 4.6E-02          |
| Marf              | A207V           | missense | 95.8%  | 4.2%   | 0.0%   | 120 | 4.2%              | 1.4E-05          |
| mRpS25            | splice donor    | splice   | 95.3%  | 4.7%   | 0.0%   | 86  | 4.7%              | 3.6E-04          |
| CG9650            | splice donor    | splice   | 94.2%  | 5.8%   | 0.0%   | 52  | 5.8%              | 9.6E-03          |
| CG32649           | E623K           | missense | 93.2%  | 6.8%   | 0.0%   | 59  | 6.8%              | 9.8E-03          |
| $\beta$ 'COP      | S570F           | missense | 90.7%  | 9.3%   | 0.0%   | 108 | 9.3%              | 3.6E-03          |
| CG7358            | L730stop        | nonsense | 90.4%  | 9.6%   | 0.0%   | 115 | 9.6%              | 3.4E-03          |
| svr               | S950T           | missense | 92.1%  | 6.3%   | 1.6%   | 63  | 9.5%              | 0.03             |
| Smr               | Q1655stop       | nonsense | 87.5%  | 12.5%  | 0.0%   | 72  | 12.5%             | 0.08             |
| CG2025            | W369stop        | nonsense | 88.0%  | 10.0%  | 2.0%   | 100 | 14.0%             | 0.09             |
| dwg               | C363S           | missense | 85.9%  | 14.1%  | 0.0%   | 64  | 14.1%             | 0.17             |
| Myb               | G111stop        | nonsense | 84.4%  | 15.6%  | 0.0%   | 109 | 15.6%             | 0.16             |
| CG15896           | Y121D           | missense | 83.2%  | 16.8%  | 0.0%   | 107 | 16.8%             | 0.27             |
| pot               | K551stop        | nonsense | 84.1%  | 14.0%  | 1.9%   | 107 | 17.8%             | 0.37             |
| oc                | Q469stop        | nonsense | 84.6%  | 12.3%  | 3.1%   | 65  | 18.5%             | 0.57             |
| Fur2              | splice donor    | splice   | 81.6%  | 17.5%  | 0.9%   | 114 | 19.3%             | 0.59             |
| $\beta$ -Spec     | W642stop        | nonsense | 82.2%  | 14.9%  | 3.0%   | 101 | 20.8%             | 0.87             |

| iso19A           | n/a          | n/a      | 81.0% | 16.5% | 2.5%  | 79  | 21.5% | NA      |
|------------------|--------------|----------|-------|-------|-------|-----|-------|---------|
| CG14786          | K313stop     | nonsense | 79.3% | 19.0% | 1.7%  | 116 | 22.4% | 0.83    |
| pl4KIII $\alpha$ | W879stop     | nonsense | 78.8% | 18.2% | 3.0%  | 33  | 24.2% | 0.72    |
| mRpS30           | splice donor | splice   | 77.3% | 21.0% | 1.7%  | 119 | 24.4% | 0.48    |
| CG17829          | H253R        | missense | 79.5% | 15.9% | 4.5%  | 88  | 25.0% | 0.46    |
| Brms1            | K188stop     | nonsense | 78.6% | 17.5% | 4.0%  | 126 | 25.4% | 0.32    |
| cac              | W623stop     | nonsense | 77.0% | 20.4% | 2.7%  | 113 | 25.7% | 0.31    |
| para             | N343I        | missense | 75.0% | 22.6% | 2.4%  | 84  | 27.4% | 0.22    |
| CG32795          | A196V        | missense | 73.3% | 25.3% | 1.3%  | 75  | 28.0% | 0.20    |
| CG18624          | stop57L      | missense | 76.0% | 19.8% | 4.1%  | 121 | 28.1% | 0.10    |
| comt             | L257Q        | missense | 75.8% | 18.9% | 5.3%  | 95  | 29.5% | 0.08    |
| I(1)G0156        | splice donor | splice   | 74.0% | 22.0% | 4.0%  | 100 | 30.0% | 0.05    |
| ATP7             | R355stop     | nonsense | 73.8% | 18.8% | 7.5%  | 80  | 33.8% | 0.01    |
| Rbf              | K458stop     | nonsense | 60.0% | 32.7% | 7.3%  | 110 | 47.3% | 7.1E-10 |
| ben              | W129stop     | nonsense | 52.9% | 29.0% | 18.1% | 138 | 65.2% | 1.1E-31 |

Genes involved in vesicle trafficking are shaded in orange, the isogenized control is shaded in yellow, candidate hypercompetition alleles are shaded in green, and candidate hypocompetition alleles are shaded in blue.
